# Supplementary material for: Prevalence and Incidence of Oral Benzodiazepine Utilization among Hospitalized Surgical Patients：A large-scale retrospective study from China
Source: Research Square preprint supplement (doi:10.21203/rs.3.rs-8529270/v1), 2026-02-03
Supplement: Supplementary file 1 [file 4a5d2afd44c330f0b3adcdd8.docx]

**Table S1.** Overview of ATC codes used.

| **Benzodiazepines** | **ATC-code** |
| --- | --- |
| Alprazolam | N05BA12 |
| Bromazepam | N05BA08 |
| Brotizolam | N05CD09 |
| Diazepam | N05BA01 |
| Flunitrazepam | N05CD03 |
| Flurazepam | N05CD01 |
| Loprazolam | N05CD11 |
| Lorazepam | N05BA06 |
| Lormetazepam | N05CD06 |
| Nitrazepam | N05CD02 |
| Prazepam | N05BA11 |
| Oxazepam | N05BA04 |
| Midazolam | N05CD08 |
| Temazepam | N05CD07 |
| Zolpidem | N05CF02 |
| Zopiclone | N05CF01 |
| Clonazepam | N03AE01 |

**Table S2.** Overview of conversion factors used for DME conversion.

| **Benzodiazepines** | **Conversion factor** |
| --- | --- |
| Alprazolam | 10 |
| Bromazepam | 1 |
| Brotizolam | 40 |
| Diazepam | 1 |
| Flunitrazepam | 10 |
| Flurazepam | 0.33 |
| Loprazolam | 10 |
| Lorazepam | 5 |
| Lormetazepam | 10 |
| Nitrazepam | 1 |
| Prazepam | 0.5 |
| Oxazepam | 0.3 |
| Midazolam | 1.33 |
| Temazepam | 0.5 |
| Zolpidem | 0.5 |
| Clonazepam | 20 |

**Table S3.** Study population consumption of benzodiazepines in defined daily doses (DDD).

| **Type of benzodiazepine** | **Total mg administered in study** | **DDD** | **Number of DDD administered in study** |
| --- | --- | --- | --- |
| Alprazolam | 47.0 | 1.0 | 47.0 DDD |
| Clonazepam | 5.3 | 8.0 | 0.7 DDD |
| Diazepam | 338.3 | 10.0 | 33.8 DDD |
| Lorazepam | 13.0 | 2.5 | 5.2 DDD |
| Zolpidem | 372.5 | 10.0 | 37.3 DDD |
| Zopiclone | 554.9 | 7.5 | 74.0 DDD |

**Table S4.** Patient demographics and incidence of benzodiazepine use at index admission.

|  | Total group, index admissions  n = 29111 | Benzodiazepine positive index admissions  n = 218 | Benzodiazepine negative index admissions  n= 28893 | *P* value | Effect sizes |
| --- | --- | --- | --- | --- | --- |
| Age, years a | 53.2 ± 13.4 | 53.9 ± 14.1 | 53.2 ± 13.4 | 0.455 3 | - 0.510 4 |
| Sex |  |  |  | 0.071 2 | 0.011 5 |
| Female | 13387.0 (46.0%) | 87.0 (39.9%) | 13300.0 (46.0%) |  |  |
| Male | 15724.0 (54.0%) | 131.0 (60.1) | 15593.0 (54.0%) |  |  |
| BMI a | 23.9 ± 3.5 | 24.1 ± 3.4 | 23.9 ± 3.5 | 0.419 3 | - 0.055 4 |
| Benzo Naive | 28878 (99.2%) | 213.0 (97.7%) | 28665.0 (99.2%) | 0.013 2 | 0.015 5 |
| LOS in days, days a | 9.0 (5.0, 15.0) | 7.0 (5.0, 11.3) | 9.0 (5.0, 15.0) | < 0.001 1 | 0.040 4 |
| Surgical Subspecialty |  |  |  | 0.361 2 |  |
| Joint Surgery | 1012.0 (3.5%) | 7.0 (3.2%) | 1005 .0 (3.5%) |  |  |
| Hepatobiliary Surgery | 10997.0 (37.8%) | 74.0 (33.9%) | 10923.0 (37.8%) |  |  |
| Orthopedic surgery | 1920.0 (6.6%) | 15.0 (6.9%) | 1905.0 (6.6%) |  |  |
| Urology Surgery | 2997.0 (10.3%) | 30.0 (13.8%) | 2967.0 (10.3%) |  |  |
| General surgery | 2446.0 (8.5%) | 16.0 (7.3%) | 2450.0 (8.5%) |  |  |
| Thyroid and breast surgery | 3868.0 (13.3%) | 36.0 (16.5%) | 3832.0 (13.3%) |  |  |
| Neurosurgery | 2149.0 (7.4%) | 21.0 (9.6%) | 2128.0 (7.4%) |  |  |
| Thoracic Surgery | 2232.0 (7.7%) | 12.0 (5.5%) | 2220.0 (7.7%) |  |  |
| Vascular surgery | 1282.0 (7.7%) | 12.0 (5.5%) | 2220.0 (7.7%) |  |  |
| Plastic surgery | 1282.0 (4.4%) | 6.0 (2.8%) | 1276.0 (4.4%) |  |  |
| Surgery Performed a | 1.0 (1.0, 1.0) | 1.0 (1.0, 1.0) | 1.0 (1.0, 1.0) | 0.993 1 | 0.000 4 |
| Consultation of PSY | 77.0 (0.3%) | 10.0 (4.6%) | 67.0 (0.2%) | < 0.001 2 | 0.073 5 |
| 30-day Surgical Readmissions | 4918.0 (16.9%) | 34.0 (15.6%) | 4884.0 (16.9%) | 0.608 2 | - 0.003 5 |

**Note:** a Continuous values are expressed as the mean ±SD or median (quartile); 1 Mann‒Whitney U; 2 χ² test; 3 Student's t test; 4 Cohen's D;

**Abbreviations:** BMI, body mass index; LOS, length of stay; PSY, psychiatry.

**Table S5.** Proportion of types of benzodiazepines administered.

| **Type of benzodiazepines** | **N of single distributions**  N total = 416 | **%** |
| --- | --- | --- |
| Alprazolam Tablets | 118 | 28.4% |
| Diazepam Tablets | 100 | 24.0% |
| Zolpidem Tartrate Tablets | 51 | 12.3% |
| Lorazepam Tablets | 11 | 2.6% |
| Clonazepam Tablets | 6 | 1.4% |
| Eszopiclone Tablets | 82 | 19.7% |
| Zopiclone Capsules 7.5 | 11 | 2.6% |
| Zopiclone Tablets 3.75 | 37 | 8.9% |
